# Supplementary material for: Sex differences in anaerobic performance in CrossFit® athletes: a comparison of three different all-out tests
Source: PeerJ. 2025 Feb 5;13:e18930. doi: 10.7717/peerj.18930 (PMC11806908; doi:10.7717/peerj.18930)
Supplement: Supplemental Information 3 [file peerj-13-18930-s003.xlsx]

## Sheet: 110723 BBDD COMPLETA CFT22
IDENTIFIER1	AGE	SEX	WEIGHT	HEIGHT	BMI	FM.kg	FMP.%	LM.kg	MM.kg	WG.PP.W	WG.rPP.Wkg	WG.rPP.W‎kgLM	WG.rPP.WkgMM	WG.XP.W	WG.rXP.Wkg	WG.rXP.WkgLM	WG.rXP.WkgMM	WG.MP.W	WG.rMP.Wkg	WG.rMP.WkgLM	WG.rMP.WkgMM	WG.FI	RJT.PP.W	RJT.rPP.Wkg	RJT.rPP.WkgLM	RJT.rPP.WkgMM	RJT.XP.W	RJT.rXP.Wkg	RJT.rXP.WkgLM	RJT.rXP.WkgMM	RJT.MP.W	RJT.rMP.Wkg	RJT.rMP.WkgLM	RJT.rMP.WkgMM	RJT.FI	AST.PP.W	AST.rPP.Wkg	AST.rPP.WkgLM	AST.rPP.WkgMM	AST.XP.W	AST.rXP.Wkg	AST.rXP.WkgLM	AST.rXP.WkgMM	AST.MP.W	AST.rMP.Wkg	AST.rMP.WkgLM	AST.rMP.WkgMM	AST.FI
CFT22-101	29	male	93.6	183.3	27.86	22.0427	23.09	73.4257	46	937.6	9.91	12.7694	20.3826	708	7.48	9.6424	15.3913	237.3	2.51	3.23184	5.1587	74.69	1086.44	11.6072	14.7964	23.6182	731.852	7.81893	9.96725	15.9098	480.817	5.13693	6.54835	10.4525	55.744	1414.9	15.08	19.2698	30.7587	1238.59	13.2	16.8686	26.9259	991.55	10.57	13.5041	21.5554	29.92
CFT22-102	31	male	87.9	181.4	26.71	15.9012	17.72	73.8102	45.2	1035	11.47	14.0225	22.8982	727.6	8.07	9.85771	16.0973	452.6	5.02	6.13194	10.0133	56.27	1259.05	14.3237	17.0579	27.8551	859.358	9.77654	11.6428	19.0123	625.791	7.11935	8.47838	13.8449	50.297	1208.89	13.74	16.3784	26.7454	1106.48	12.57	14.9909	24.4796	984.16	11.18	13.3337	21.7735	18.59
CFT22-103	30	male	73.5	174.3	24.19	18.5419	24.87	56.005	33.6	702.6	9.44	12.5453	20.9107	494.9	6.65	8.83671	14.7292	286.8	3.85	5.12097	8.53571	59.18	1208.97	16.4486	21.5868	35.9812	847.134	11.5256	15.126	25.2123	560.966	7.63219	10.0164	16.6954	53.6	963.44	12.54	17.2028	28.6738	895.68	11.66	15.9929	26.6571	845.55	11.01	15.0978	25.1652	12.24
CFT22-104	29	male	90.6	179.5	28.12	13.5316	14.69	78.5903	45.2	951.4	10.36	12.1058	21.0487	771.4	8.4	9.81546	17.0664	581.6	6.34	7.4004	12.8673	38.87	1289.1	14.2284	16.4027	28.5198	1001.03	11.049	12.7374	22.1468	759.826	8.3866	9.66819	16.8103	41.057	1786.65	19.63	22.7337	39.5277	1688.48	18.55	21.4846	37.3558	1465.1	16.1	18.6422	32.4137	18
CFT22-105	28	male	82.2	176.4	26.42	15.0949	18.11	68.2556	39.3	904.7	10.78	13.2546	23.0204	607.9	7.25	8.90622	15.4682	362.2	4.32	5.30652	9.21628	59.96	1069.74	13.0139	15.6726	27.2199	679.822	8.27034	9.95994	17.2983	434.073	5.28069	6.35952	11.0451	59.423	1384.37	16.13	20.2821	35.2257	1191.21	13.88	17.4522	30.3107	1007.23	11.74	14.7567	25.6293	27.24
CFT22-106	45	male	88.1	171.4	29.99	20.9187	23.31	68.8319	38	883.4	9.97	12.8342	23.2474	619.6	6.99	9.00165	16.3053	389.3	4.39	5.65581	10.2447	55.93	1059.23	12.0231	15.3887	27.8746	750.836	8.52254	10.9083	19.7588	564.794	6.41083	8.20542	14.863	46.679	1246.77	14.41	18.1133	32.8097	1186.25	13.71	17.234	31.2171	1092.64	12.63	15.874	28.7537	12.36
CFT22-107	35	male	81.1	184.8	23.75	15.5653	18.91	66.7326	40.6	926.2	11.23	13.8793	22.8128	627	7.6	9.3957	15.4433	380.1	4.61	5.69586	9.36207	58.96	1465.15	18.066	21.9556	36.0875	944.681	11.6483	14.1562	23.268	651.96	8.03896	9.76973	16.0581	55.502	1323.77	16.16	19.8369	32.6052	1184.49	14.46	17.7498	29.1746	1029.64	12.57	15.4293	25.3606	22.22
CFT22-108	41	male	73.4	171.8	24.87	13.1492	17.53	61.866	37	676.4	9.07	10.9333	18.2811	563	7.55	9.10032	15.2162	412.2	5.53	6.66279	11.1405	39.06	1143.86	15.5839	18.4893	30.9151	920.786	12.5448	14.8836	24.8861	764.99	10.4222	12.3653	20.6754	33.122	1204.58	16.02	19.4708	32.5562	1152.48	15.33	18.6287	31.1481	938.33	12.48	15.1671	25.3603	22.1
CFT22-109	27	male	77.3	166.5	27.88	10.1551	12.89	68.649	39.3	892	11.22	12.9936	22.6972	685	8.62	9.97829	17.43	482.6	6.07	7.02996	12.2799	45.9	#NULL!	#NULL!	#NULL!	#NULL!	#NULL!	#NULL!	#NULL!	#NULL!	#NULL!	#NULL!	#NULL!	#NULL!	#NULL!	1193.5	14.77	17.3855	30.369	1021.83	12.65	14.8848	26.0008	968.25	11.98	14.1043	24.6374	18.87
CFT22-110	34	male	78.2	176.5	25.1	10.9854	13.8	68.5915	42.5	795.5	9.97	11.5977	18.7176	609.1	7.63	8.88011	14.3318	361.9	4.54	5.27617	8.51529	54.51	1167.68	14.932	17.0237	27.4749	817.828	10.4582	11.9232	19.243	415.339	5.31124	6.05526	9.77268	64.431	1131.54	13.92	16.4968	26.6245	1057.04	13	15.4107	24.8715	901.84	11.09	13.148	21.2198	20.3
CFT22-111	38	male	75.3	177.5	23.9	11.0931	14.44	65.7518	39.4	794.2	10.31	12.0788	20.1574	550	7.14	8.36479	13.9594	157.6	2.05	2.39689	4	80.16	1029.99	13.6785	15.6649	26.142	624.232	8.28993	9.49377	15.8435	198.817	2.64033	3.02375	5.04612	80.697	1299.32	16.74	19.761	32.9777	1068.9	13.77	16.2566	27.1294	1038.7	13.39	15.7973	26.3629	20.06
CFT22-112	38	male	75.3	170.8	25.81	15.1939	19.84	61.3826	34.1	786.3	10.08	12.8098	23.0587	557.7	7.15	9.08564	16.3548	330.5	4.24	5.38426	9.69208	57.97	950.027	12.6166	15.4771	27.86	674.73	8.96056	10.9922	19.7868	451.687	5.9985	7.35855	13.246	52.455	1364.53	17.47	22.2299	40.0155	1193.67	15.28	19.4464	35.005	975.02	12.48	15.8843	28.593	28.54
CFT22-113	40	male	76.3	176.4	24.52	13.9865	18	63.6981	37.6	843.6	10.79	13.2437	22.4362	579.3	7.41	9.09446	15.4069	343.8	4.4	5.39733	9.14362	59.25	1033.48	13.545	16.2247	27.4862	795.902	10.4312	12.4949	21.1676	295.662	3.87499	4.64161	7.86335	71.392	1664.64	21.21	26.1333	44.2723	1231.71	15.69	19.3367	32.7582	932.85	11.88	14.6449	24.8098	43.96
CFT22-114	24	male	74.4	176.3	23.94	12.0868	16.03	63.3278	38	1091	14.34	17.2278	28.7105	685.2	9	10.8199	18.0316	357.1	4.69	5.63891	9.39737	67.27	989.754	13.3031	15.6291	26.0462	734.472	9.87194	11.5979	19.3282	527.383	7.08848	8.32783	13.8785	46.716	1057.36	13.97	16.6966	27.8253	927.98	12.26	14.6536	24.4205	814.67	10.76	12.8643	21.4387	22.95
CFT22-115	27	male	98.6	179.8	30.5	20.6751	20.58	79.8014	46.2	1294.68	12.86	16.2238	28.0234	927.75	9.21	11.6257	20.0812	687.34	6.83	8.61314	14.8775	46.91	1580.25	16.0269	19.8023	34.2045	1226.51	12.4392	15.3695	26.5478	694.689	7.04553	8.70523	15.0366	56.039	2361.41	23.27	29.5911	51.1128	1933.31	19.05	24.2265	41.8465	1215.96	11.98	15.2373	26.3195	48.51
CFT22-116	37	male	76.4	175.9	24.69	13.291	17.17	64.0971	40.1	747.3	9.45	11.6589	18.6359	570.9	7.22	8.9068	14.2369	357.6	4.52	5.57903	8.91771	52.15	1059	13.8613	16.5218	26.409	800.054	10.4719	12.4819	19.9515	660.9	8.65052	10.3109	16.4813	37.592	1471.36	18.44	22.9552	36.6923	1312.11	16.44	20.4707	32.7209	1007.18	12.62	15.7133	25.1167	31.55
CFT22-117	29	male	91.5	176.1	29.51	20.9739	22.65	71.6177	43.9	993.8	10.61	13.8765	22.6378	743	7.93	10.3745	16.9248	442.7	4.72	6.18143	10.0843	55.45	1359.75	14.8606	18.9862	30.9738	1108.93	12.1195	15.4841	25.2604	844.413	9.22856	11.7906	19.2349	37.899	1791.14	19.43	25.0097	40.8005	1611.11	17.47	22.496	36.6995	1315.21	14.26	18.3643	29.9592	26.57
CFT22-118	42	male	87.7	179.4	27.25	15.0539	16.88	74.1155	43.9	1045	11.48	14.0996	23.8041	753.3	8.28	10.1639	17.1595	398.1	4.37	5.37135	9.06834	61.9	1059	12.0753	14.2885	24.123	800.053	9.12261	10.7947	18.2244	660.9	7.53592	8.91717	15.0547	37.592	1529.46	17.13	20.6362	34.8396	1436.84	16.09	19.3865	32.7298	1231.04	13.79	16.6098	28.0419	19.51
CFT22-119	33	male	78.5	178.8	24.55	15.1553	19.04	64.4424	40	729.9	9.09	11.3264	18.2475	580.4	7.23	9.0065	14.51	379.8	4.73	5.89364	9.495	47.97	1002.55	12.7713	15.5573	25.0637	617.14	7.86166	9.57662	15.4285	395.243	5.03494	6.13328	9.88107	60.576	1347.43	16.59	20.9091	33.6857	1203.59	14.82	18.677	30.0897	1032.15	12.71	16.0166	25.8038	23.4
CFT22-120	38	male	73.6	174.7	24.12	12.5796	16.8	62.2883	38.1	832.77	11.16	13.3696	21.8575	589.22	7.9	9.45956	15.4651	347.23	4.65	5.57456	9.11365	58.3	1028.53	13.9746	16.5125	26.9956	832.33	11.3088	13.3625	21.8459	628.559	8.5402	10.0911	16.4976	38.888	1068.22	14.36	17.1496	28.0373	983.85	13.22	15.7951	25.8228	885.64	11.9	14.2184	23.2451	17.09
CFT22-121	24	male	84.8	177.8	26.82	13.3258	15.49	72.7087	43.8	888.64	10.24	12.2219	20.2886	687	7.91	9.44866	15.6849	443.17	5.11	6.09514	10.118	50.13	1563.92	18.4425	21.5094	35.706	993.818	11.7196	13.6685	22.6899	493.306	5.81729	6.78469	11.2627	68.457	1668.73	19.14	22.9509	38.0989	1481.23	16.99	20.3721	33.818	1180.67	13.54	16.2383	26.9559	29.25
CFT22-122	34	male	82.2	173.1	27.43	13.2202	15.75	70.737	40.9	833.48	9.89	11.7828	20.3785	665.72	7.9	9.4112	16.2768	338.89	4.02	4.79085	8.28582	59.34	1182.36	14.3839	16.7148	28.9085	727.559	8.85108	10.2854	17.7887	276.709	3.36629	3.9118	6.7655	76.597	1523.77	16.95	21.5414	37.256	1305.28	14.52	18.4526	31.9139	1112.07	12.37	15.7212	27.19	27.02
CFT22-123	35	male	86.2	180.6	26.43	15.3529	17.59	71.9072	44	872.27	9.85	12.1305	19.8243	666.43	7.52	9.26792	15.1461	377.74	4.26	5.25316	8.585	56.69	1161.51	13.4745	16.1529	26.3979	759.69	8.81311	10.5649	17.2657	575.245	6.67338	7.99983	13.0738	50.474	1562.05	18.75	21.7231	35.5011	1328.79	15.95	18.4792	30.1998	857.78	10.3	11.929	19.495	45.09
CFT22-124	27	male	89.6	178.2	28.22	16.5923	18.22	74.4963	43	960.97	10.45	12.8996	22.3481	701.87	7.63	9.42154	16.3226	397.62	4.32	5.33745	9.24698	58.62	1347.07	15.0342	18.0823	31.3271	889.382	9.92614	11.9386	20.6833	473.733	5.2872	6.35915	11.017	64.832	1532.22	16.56	20.5677	35.633	1441.76	15.59	19.3534	33.5293	1278.64	13.82	17.1638	29.7358	16.55
CFT22-125	38	male	92.7	181.3	28.2	14.4023	15.24	80.1232	47.4	966.44	10.21	12.0619	20.389	656.39	6.93	8.19226	13.8479	393.89	4.16	4.91605	8.30992	59.24	1276.54	13.7706	15.9322	26.9312	1001.18	10.8002	12.4955	21.122	721.178	7.7797	9.00086	15.2147	43.505	1374.58	14.59	17.1558	28.9996	1169.62	12.42	14.5978	24.6755	880.72	9.35	10.9921	18.5806	35.93
CFT22-201	25	female	64.5	162	24.58	20.2568	31	45.0776	26.3	494.4	7.54	10.9678	18.7985	360.8	5.5	8.00398	13.7186	226.7	3.46	5.02911	8.61977	54.15	758.746	11.7635	16.832	28.8497	481.152	7.45972	10.6739	18.2948	132.791	2.05878	2.94583	5.04909	82.499	916.94	13.89	20.3414	34.8646	783.53	11.87	17.3818	29.792	577.61	8.75	12.8137	21.9624	37.01
CFT22-202	32	female	62.2	161.6	23.82	15.5549	24.58	47.7191	28.1	441.2	7	9.24577	15.7011	353.1	5.6	7.39955	12.5658	237.1	3.76	4.96866	8.43772	46.26	769.309	12.3683	16.1216	27.3775	550.063	8.84346	11.5271	19.5752	334.729	5.3815	7.01457	11.9121	56.49	901.39	13.66	18.8895	32.0779	811.29	12.29	17.0014	28.8715	653.24	9.9	13.6893	23.247	27.53
CFT22-203	25	female	65.7	163	24.73	15.9886	23.91	50.8843	30.7	627.2	9.25	12.326	20.43	411.2	6.06	8.08107	13.3941	106.1	1.56	2.08512	3.45603	83.08	#NULL!	#NULL!	#NULL!	#NULL!	#NULL!	#NULL!	#NULL!	#NULL!	#NULL!	#NULL!	#NULL!	#NULL!	#NULL!	1154.2	16.95	22.6828	37.5961	1099.6	16.15	21.6098	35.8176	943.5	13.85	18.5421	30.7329	18.26
CFT22-204	28	female	67.7	163.1	25.45	12.5502	18.23	56.304	33.4	565	8.11	10.0348	16.9162	449.3	6.45	7.97989	13.4521	333.2	4.78	5.91787	9.97605	41.03	907.741	13.4083	16.1221	27.1779	780.923	11.5351	13.8698	23.3809	641.639	9.47768	11.396	19.2107	29.315	1162.03	17.09	20.6385	34.7913	1085.3	15.96	19.2757	32.494	976.69	14.36	17.3467	29.2422	15.95
CFT22-205	27	female	65.7	164.5	24.28	13.87	20.75	52.9825	31	658.1	9.81	12.4211	21.229	422.7	6.3	7.97811	13.6355	240.8	3.59	4.5449	7.76774	63.41	1030.37	15.683	19.4474	33.2378	732.983	11.1565	13.8344	23.6446	391.129	5.95326	7.38223	12.6171	62.04	1138.64	16.77	21.4909	36.7303	1037.34	15.28	19.5789	33.4626	864.19	12.73	16.3109	27.8771	24.1
CFT22-206	34	female	60.8	164.2	22.55	15.6139	25.4	45.8579	27.3	508	8.03	11.0777	18.6081	348.4	5.5	7.59738	12.7619	220.8	3.49	4.81487	8.08791	56.54	757.014	12.4509	16.5078	27.7295	403.089	6.62975	8.78996	14.7652	260.94	4.29178	5.69019	9.55824	65.53	758.32	12.08	16.5363	27.7773	697.74	11.11	15.2153	25.5582	545.15	8.68	11.8878	19.9689	28.11
CFT22-207	28	female	57.5	162.1	21.88	14.1604	24.2	44.3446	27.3	558.4	9.63	12.5923	20.4542	336.8	5.81	7.59506	12.337	111.5	1.92	2.5144	4.08425	80.03	983.83	17.1101	22.186	36.0377	698.786	12.1528	15.7581	25.5966	469.43	8.164	10.586	17.1952	52.285	911.04	15.23	20.5446	33.3714	809.51	13.54	18.255	29.6524	682.37	11.41	15.3879	24.9952	25.1
CFT22-208	34	female	66.7	167.6	23.75	18.2255	27.4	48.3013	28.8	494.9	9.08	10.2461	17.184	376.8	6.91	7.80104	13.0833	255.3	4.68	5.28558	8.86458	48.41	780.835	11.7067	16.1659	27.1123	393.477	5.89921	8.14631	13.6624	258.589	3.8769	5.35367	8.97878	66.883	836.8	12.02	17.3246	29.0556	724.4	10.41	14.9975	25.1528	606.41	8.71	12.5547	21.0559	27.53
CFT22-209	26	female	63.2	160	24.69	19.0313	29.65	45.1612	25.2	494.1	7.16	10.9408	19.6071	386	5.59	8.54716	15.3175	255.2	3.7	5.65087	10.127	48.35	687.289	10.8748	15.2186	27.2734	400.817	6.34204	8.87525	15.9054	288.663	4.56745	6.39184	11.4549	58	732.02	11.19	16.2091	29.0484	672.84	10.29	14.8986	26.7	597.59	9.14	13.2324	23.7139	18.36
CFT22-210	33	female	59	161	22.76	13.2575	22.31	46.1638	26.9	468.9	7.75	10.1573	17.4312	344.1	5.69	7.4539	12.7918	231.7	3.83	5.01909	8.61338	50.59	737.006	12.4916	15.965	27.398	420.766	7.13163	9.11463	15.6419	310.12	5.25627	6.71782	11.5286	57.922	783.1	12.84	16.9635	29.1115	648.6	10.63	14.05	24.1115	469.86	7.7	10.1781	17.4669	40
CFT22-211	33	female	64.1	164	23.83	15.3357	23.78	49.1537	29.7	499.7	7.49	10.1661	16.8249	366.7	5.5	7.46027	12.3468	259.3	3.89	5.27529	8.73064	48.11	833.721	13.0066	16.9615	28.0714	519.583	8.10582	10.5706	17.4944	292.667	4.56579	5.95412	9.85411	64.896	911.87	13.86	18.5514	30.7027	799.27	12.15	16.2606	26.9114	581.19	8.83	11.8239	19.5687	36.26
CFT22-212	30	female	64.1	168.9	22.47	10.9694	16.88	54.0136	31.3	531.1	7.94	9.83271	16.9681	412.3	6.16	7.63326	13.1725	276.2	4.13	5.11353	8.82428	47.99	768.311	11.9861	14.2244	24.5467	461.998	7.20746	8.55336	14.7603	343.362	5.35666	6.35695	10.97	55.31	936.07	14.14	17.3303	29.9064	846.15	12.78	15.6655	27.0335	764.43	11.55	14.1525	24.4227	18.34
CFT22-213	22	female	68.4	160	26.72	18.7384	27.03	50.5971	30.1	474.96	6.6	9.3871	15.7794	400.56	5.56	7.91666	13.3076	324.17	4.5	6.40689	10.7698	31.75	761.311	11.1303	15.0465	25.2927	375.728	5.4931	7.42588	12.4827	150.528	2.2007	2.97503	5.00093	80.228	811.32	11.62	16.0349	26.9542	745.08	10.67	14.7258	24.7535	600.54	8.6	11.8691	19.9515	25.98
CFT22-214	49	female	49.4	159	19.54	10.4762	20.95	39.5303	23.4	434.19	8.46	10.9837	18.5551	278.23	5.42	7.03839	11.8902	211.22	4.12	5.34324	9.0265	51.35	593	12.004	15.0011	25.3419	397.91	8.05486	10.0659	17.0047	172.216	3.48615	4.35655	7.35966	70.959	856.72	16.8	21.6725	36.612	716.2	14.04	18.1177	30.6068	605.65	11.88	15.3211	25.8825	29.31
CFT22-215	30	female	63.4	172.3	21.36	13.756	21.49	50.2456	29.2	662.29	10.24	13.1811	22.6812	484.6	7.49	9.64463	16.5959	335.78	5.19	6.68278	11.4993	49.3	765.855	12.0797	15.2422	26.2279	456.62	7.20221	9.08776	15.6377	354.386	5.58968	7.05308	12.1365	53.727	1089.13	16.81	21.6761	37.299	952.64	14.7	18.9597	32.6247	833.18	12.86	16.5822	28.5336	23.5
CFT22-216	21	female	55.7	162.6	21.07	12.5834	22.44	43.4822	26.3	449.83	7.81	10.3451	17.1038	342.08	5.94	7.86712	13.0068	240.29	4.17	5.52616	9.1365	46.58	738.609	13.2605	16.9865	28.084	527.972	9.47885	12.1422	20.075	445.815	8.00386	10.2528	16.9511	39.641	975.36	16.67	22.4312	37.0859	779.46	13.32	17.9259	29.6373	566.04	9.68	13.0177	21.5224	41.97
CFT22-217	40	female	56.9	156.6	23.2	17.6142	30.37	40.3754	24.1	456.16	7.69	11.298	18.9278	309.63	5.22	7.66878	12.8477	170.34	2.87	4.2189	7.06805	62.66	738.308	12.9755	18.2861	30.6352	476.856	8.3806	11.8106	19.7866	188.156	3.30678	4.66016	7.8073	74.515	936.33	15.95	23.1906	38.8519	685.88	11.68	16.9876	28.4598	480.09	8.18	11.8907	19.9207	48.73
CFT22-218	43	female	70.1	164.8	25.81	19.5271	27.41	51.7064	27.4	505.1	8.52	9.76861	18.4343	403.45	6.8	7.8027	14.7245	257.82	3.63	4.98623	9.40949	48.96	828.251	11.8153	16.0183	30.2281	435.838	6.21738	8.42908	15.9065	166.262	2.37178	3.2155	6.06796	79.926	901.33	12.69	17.4317	32.8953	786.78	11.08	15.2163	28.7146	687.02	9.68	13.2869	25.0737	23.78
CFT22-219	32	female	61.4	164.5	22.69	14.586	23.36	47.8581	26.7	516.22	8.23	10.7865	19.3341	429.91	6.86	8.98301	16.1015	264.33	4.22	5.5232	9.9	48.8	781.102	12.7215	16.3212	29.2548	404.33	6.58518	8.44851	15.1434	322.771	5.25686	6.74433	12.0888	58.677	793.22	12.61	16.5744	29.7086	709.19	11.27	14.8186	26.5614	600.88	9.55	12.5554	22.5049	24.25
CFT22-220	40	female	69.5	164.6	25.65	19.7794	28.13	50.5382	28.9	600.86	10.13	11.8892	20.791	419.99	7.08	8.31034	14.5325	299.47	4.23	5.92561	10.3623	50.16	882.603	12.6993	17.4641	30.5399	466.499	6.71222	9.23062	16.1418	213.06	3.06561	4.21582	7.37232	75.86	911.83	13.14	18.0424	31.5512	794.97	11.45	15.7301	27.5076	659.76	9.51	13.0547	22.8291	27.64
CFT22-221	34	female	55.5	148.1	25.3	16.7032	29.78	39.3761	21.4	389.69	6.57	9.89662	18.2098	312.04	5.26	7.92461	14.5813	209.69	3.67	5.32532	9.7986	46.19	649.564	11.7039	16.4964	30.3535	326.35	5.88018	8.28803	15.25	151.788	2.73492	3.85483	7.0929	76.632	783.76	13.85	19.9045	36.6243	705.19	12.46	17.9091	32.9528	425.76	7.52	10.8127	19.8953	45.68
CFT22-222	51	female	51.3	150.5	22.65	11.4433	21.91	40.7739	21.9	395.75	7.5	9.70596	18.0708	282.4	5.35	6.926	12.895	214.96	4.07	5.272	9.81553	45.68	572	11.1501	14.0286	26.1187	308.304	6.00982	7.56131	14.0778	159.206	3.10343	3.9046	7.26968	72.167	620.22	11.77	15.2112	28.3205	526.59	9.99	12.9149	24.0452	422.83	8.02	10.3701	19.3073	31.83
CFT22-223	38	female	62.2	162.6	23.53	15.8193	25.05	47.3196	26.7	482.97	7.46	10.2066	18.0888	331	5.12	6.99499	12.397	158.29	2.45	3.34513	5.92846	67.23	703.084	11.3036	14.8582	26.3327	361.244	5.80778	7.63414	13.5297	197.066	3.16826	4.16458	7.38075	71.971	839.58	13.02	17.7428	31.4449	715.67	11.1	15.1242	26.8041	582.83	9.04	12.3169	21.8288	30.58
CFT22-224	32	female	67.3	163.8	25.08	20.5714	30.03	47.9357	27.7	515.02	7.41	10.744	18.5928	369.95	5.32	7.71762	13.3556	220.39	3.17	4.59761	7.95632	57.21	763.859	11.3501	15.9351	27.5761	463.815	6.89175	9.67577	16.7442	266.305	3.95698	5.55546	9.6139	65.137	860.27	12.5	17.9463	31.0567	731.3	10.63	15.2558	26.4007	451.72	6.57	9.42345	16.3076	47.49
CFT22-225	43	female	67	163.6	25.03	19.0902	28.06	48.9331	28.9	437.11	6.36	8.9328	15.1249	319.48	4.65	6.52891	11.0547	203.02	2.96	4.14893	7.02491	53.55	770.361	11.4979	15.7431	26.6561	308.666	4.60696	6.30792	10.6805	110.736	1.65278	2.26301	3.8317	85.625	874.36	12.73	17.8685	30.2547	624.76	9.09	12.7676	21.618	408.62	5.95	8.35058	14.1391	53.27
